# Supplementary material for: First characterization of Plasmodium vivax liver stage antigen (PvLSA) using synthetic peptides
Source: PubMed Central journal article supplement (PMC3925417; doi:10.1186/1756-3305-7-64), 2014-02-12

**Supplementary figure 1.**  
**Alignment of six isolates**  
**of PvLSA and their SNP**

 : SNP

 : Intron part

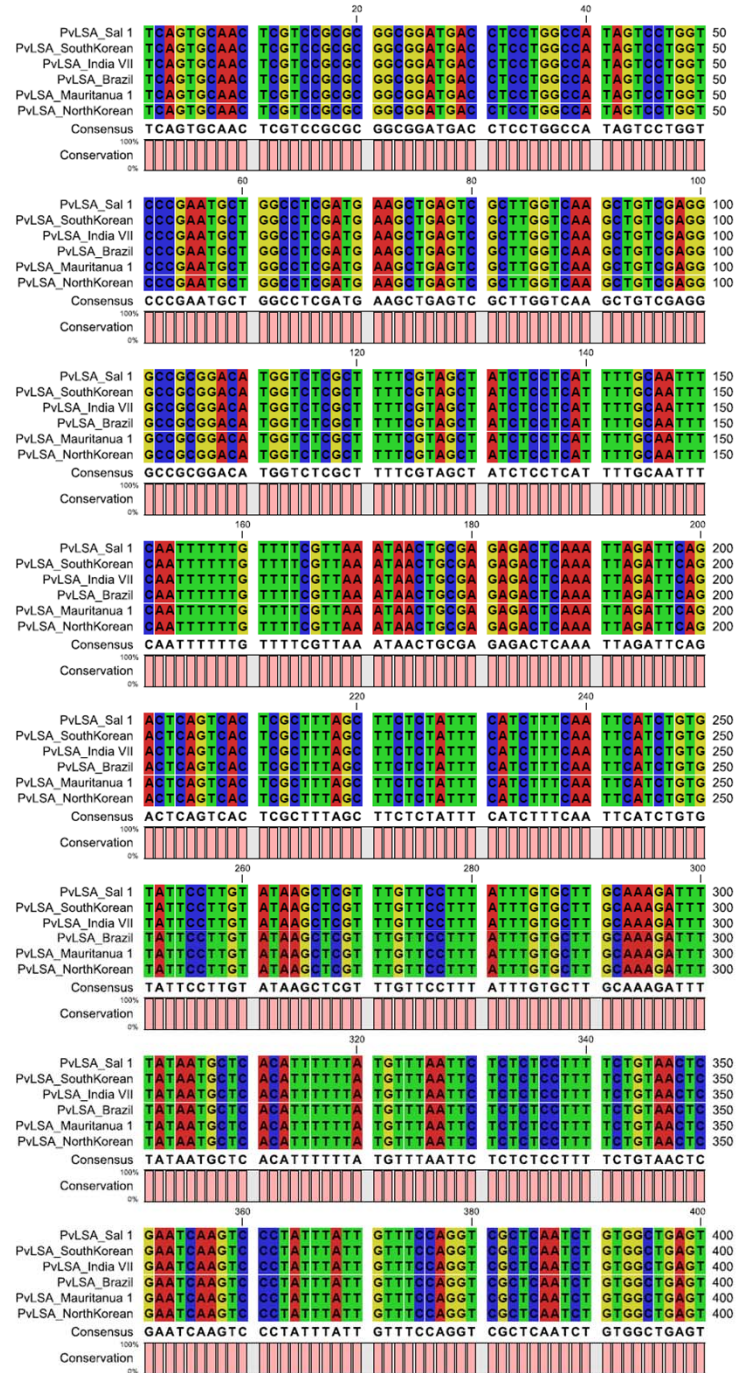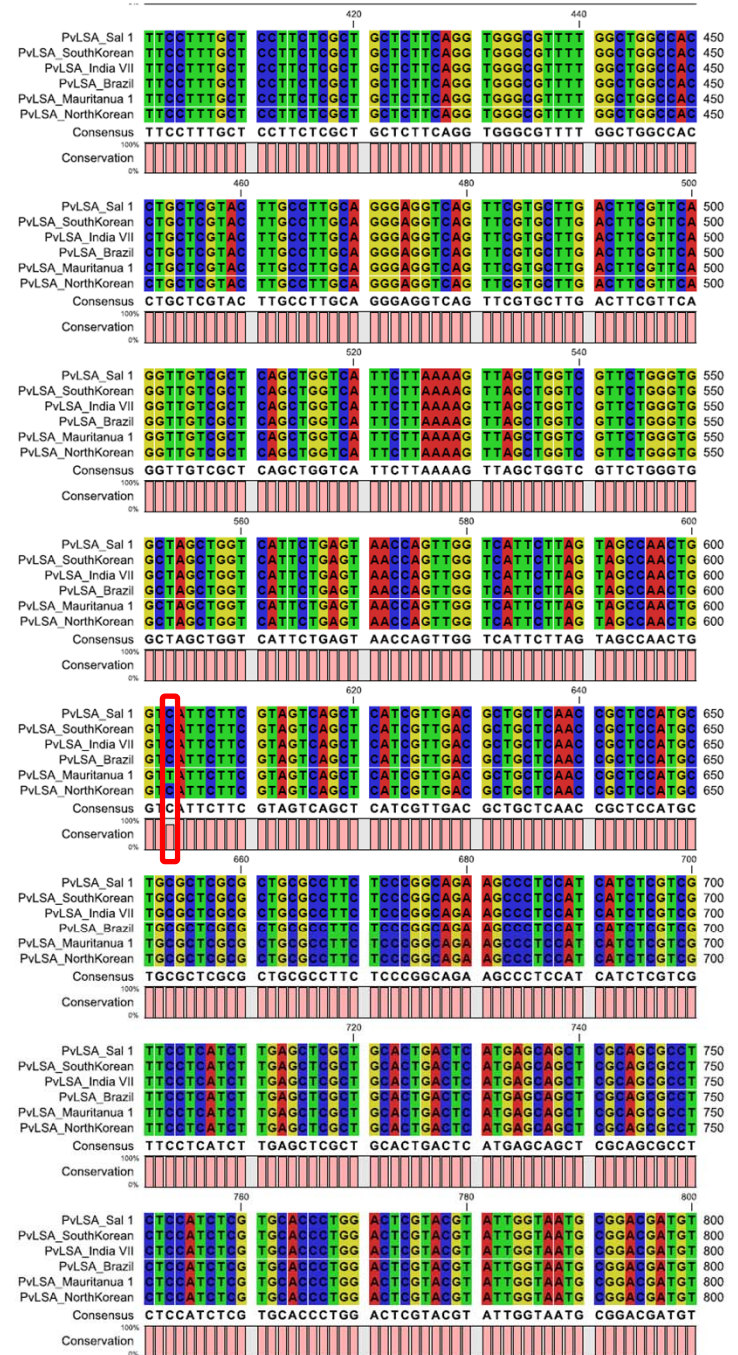



# Supplementary figure 1. Alignment of six isolates of PvLSA and their SNP

  : SNP

  : Intron part

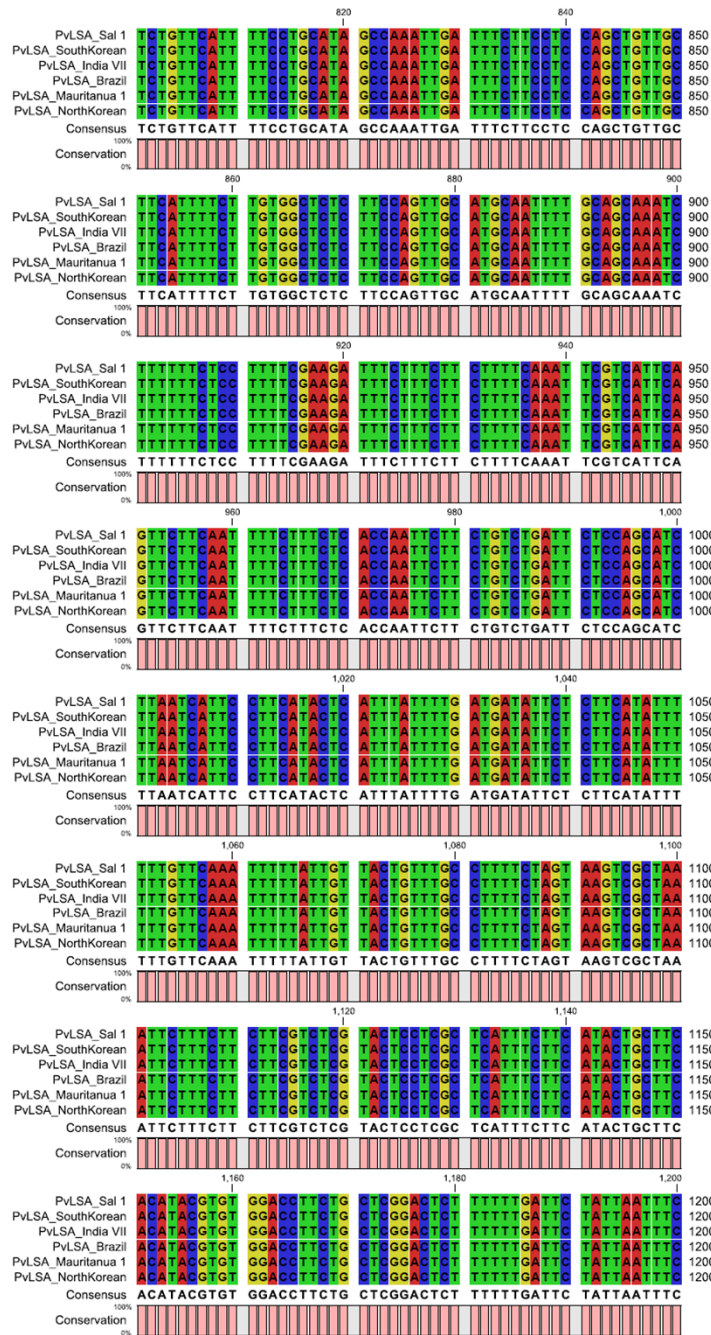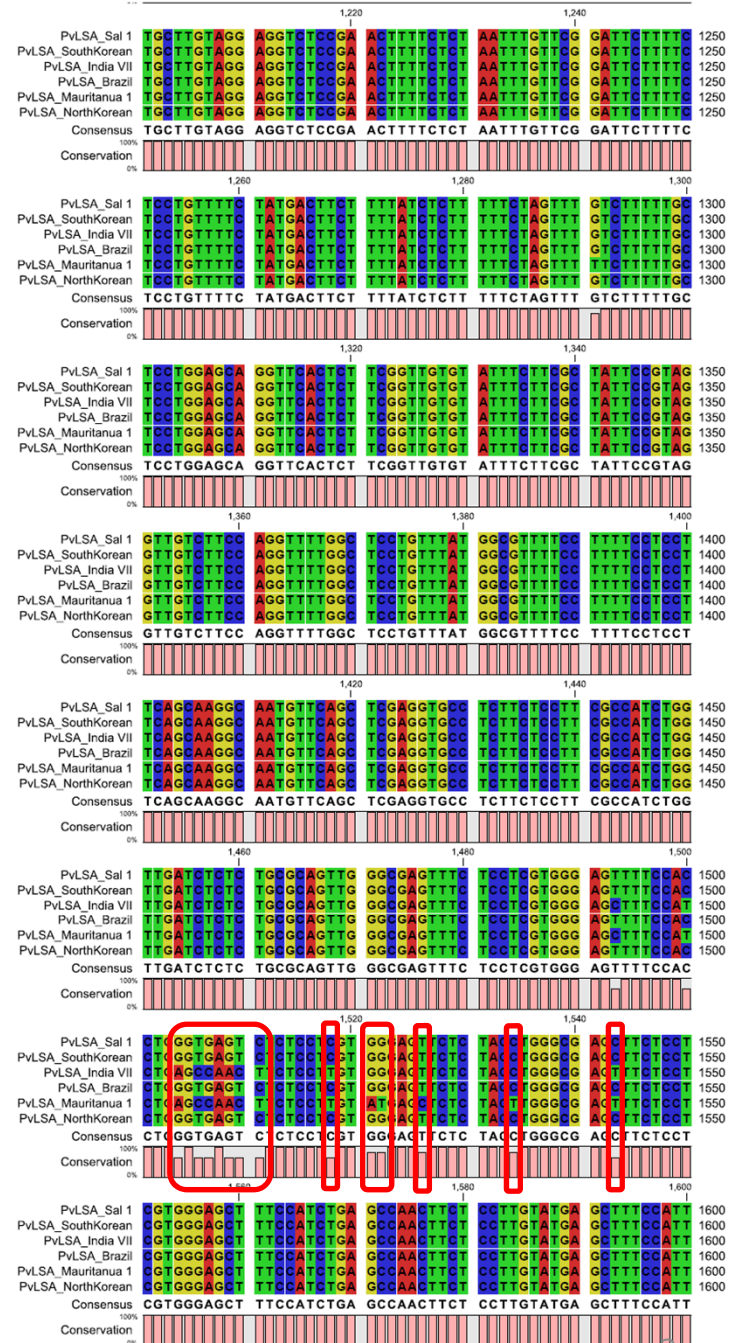

**Supplementary figure 1.**  
**Alignment of six isolates**  
**of PvLSA and their SNP**

 : SNP

 : Intron part

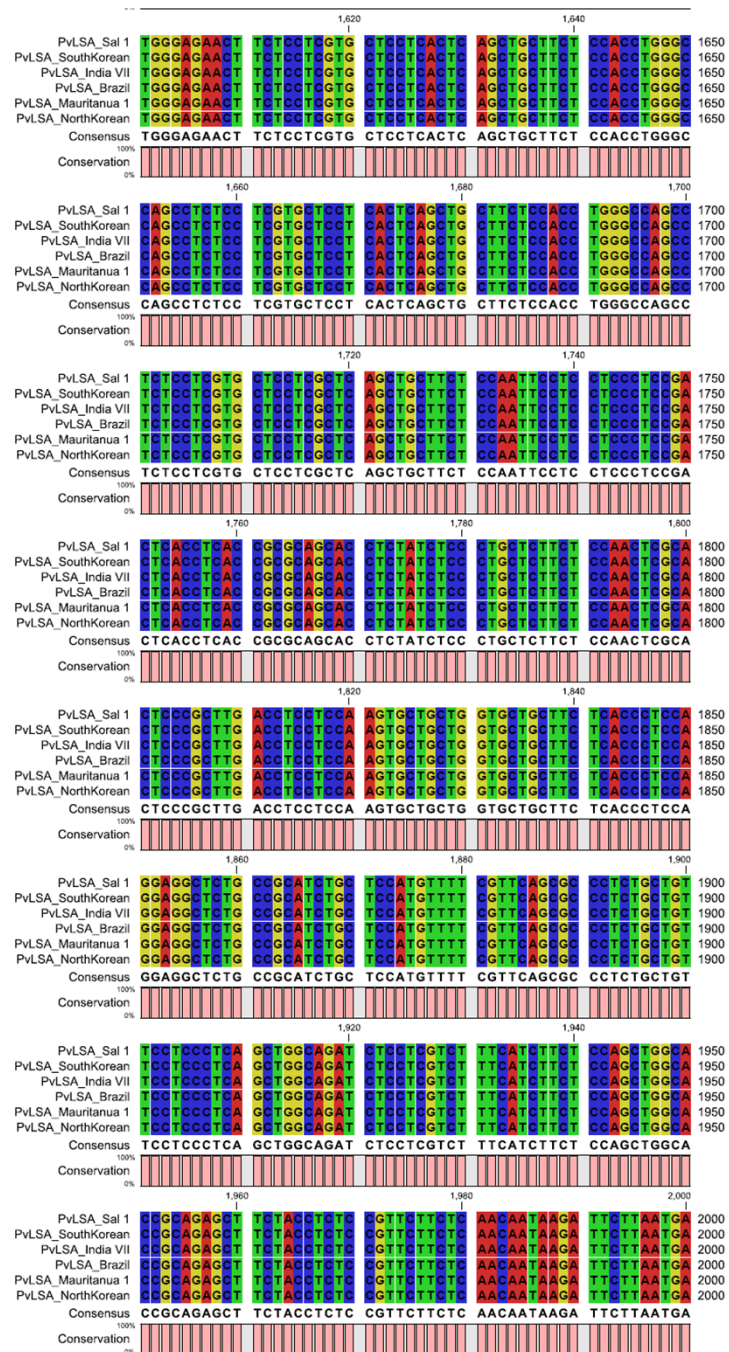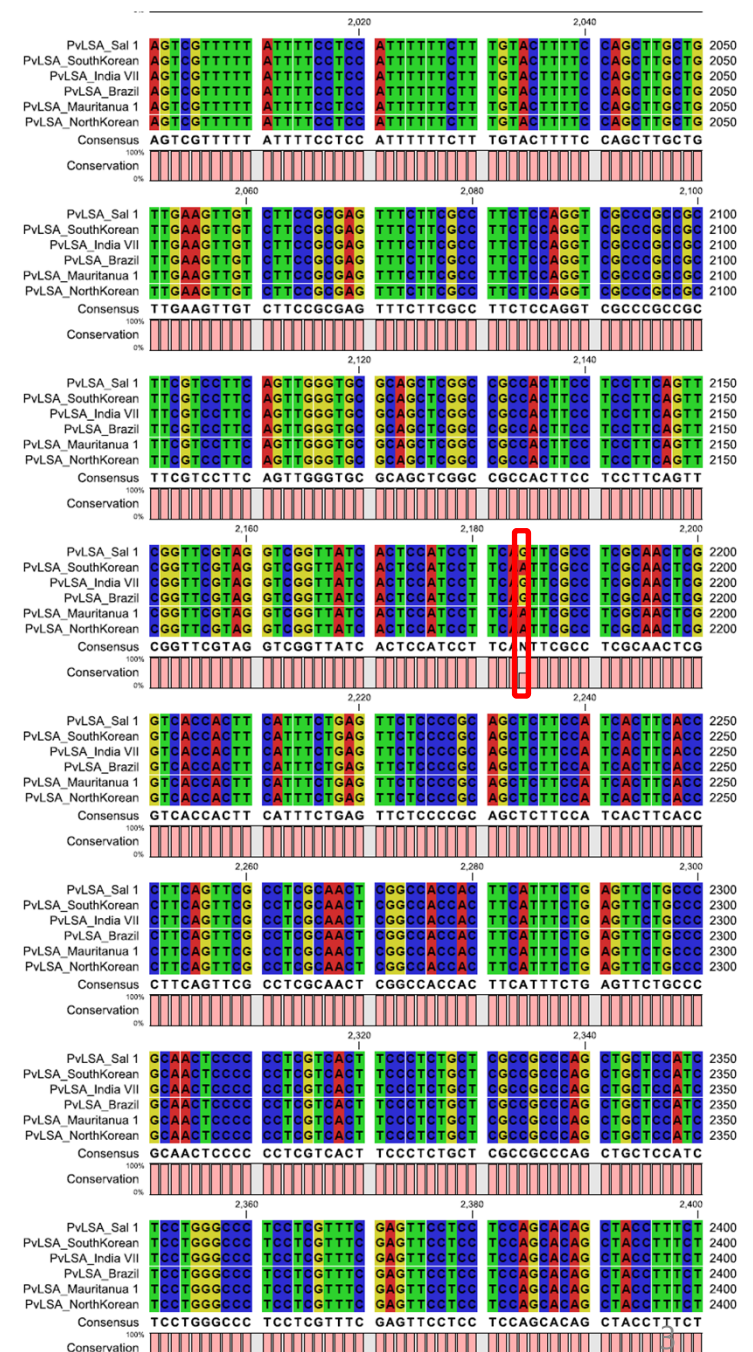



**Supplementary figure 1.**  
**Alignment of six isolates**  
**of PvLSA and their SNP**

 : SNP

 : Intron part

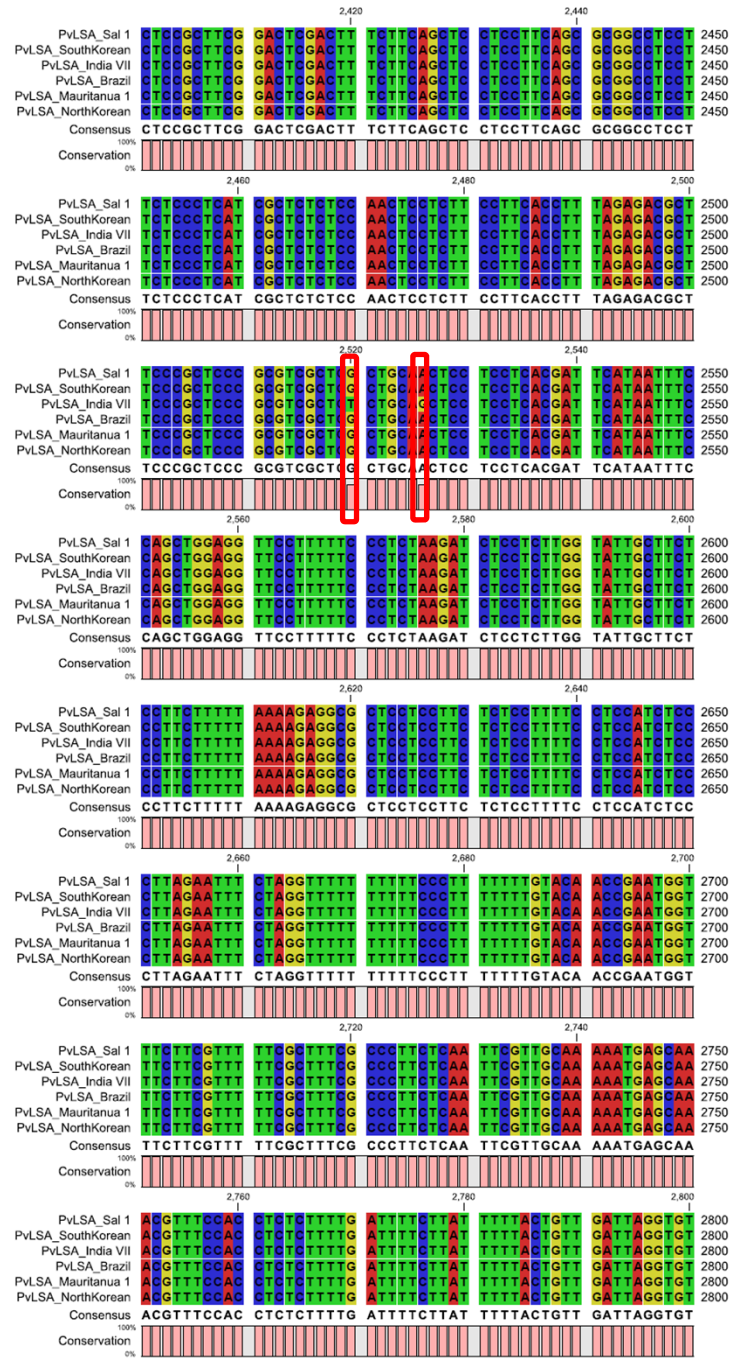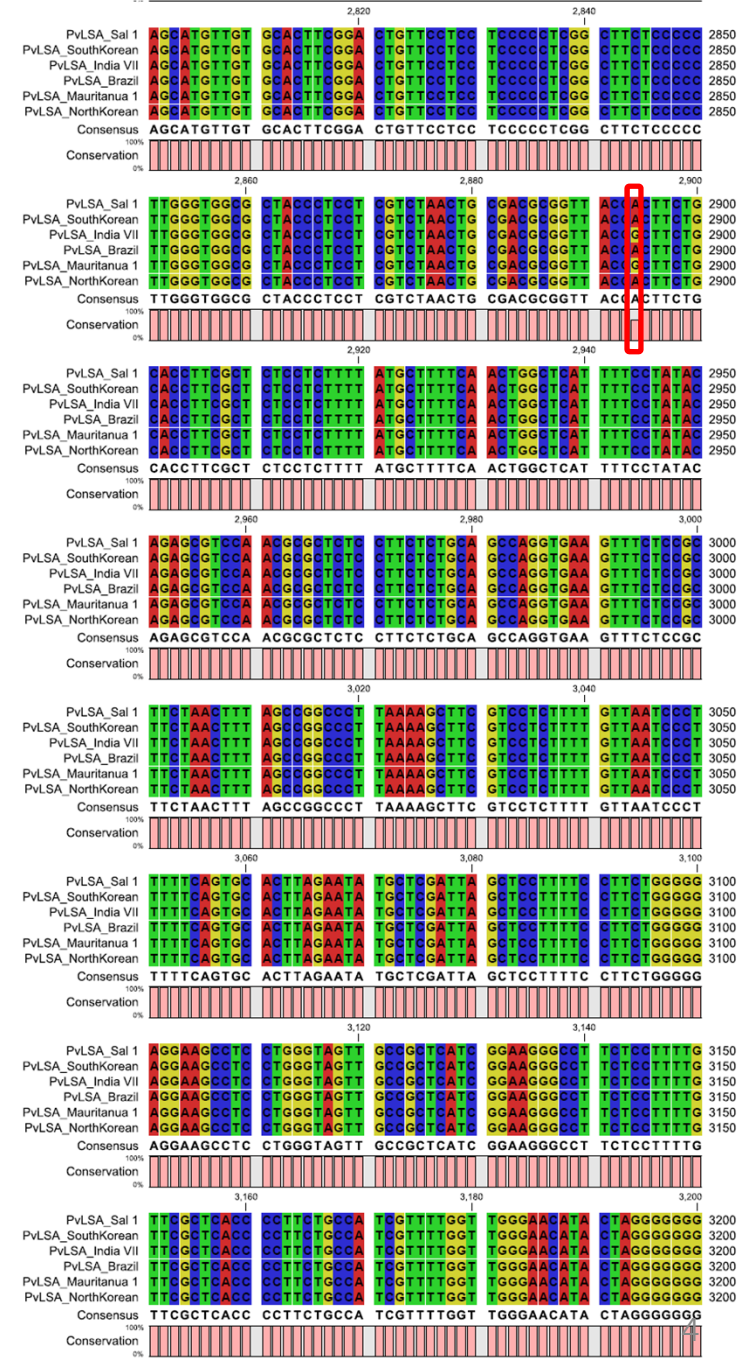



# Supplementary figure 1. Alignment of six isolates of PvLSA and their SNP

 : SNP

 : Intron part

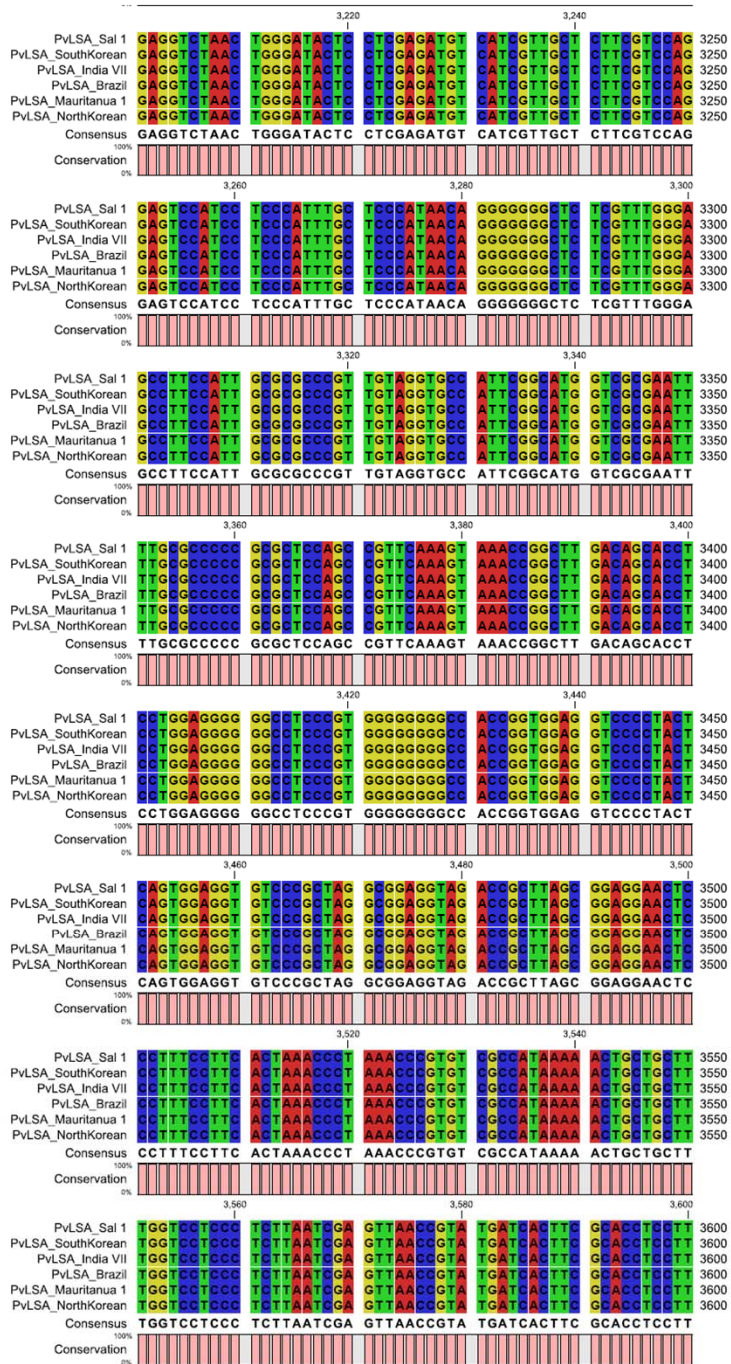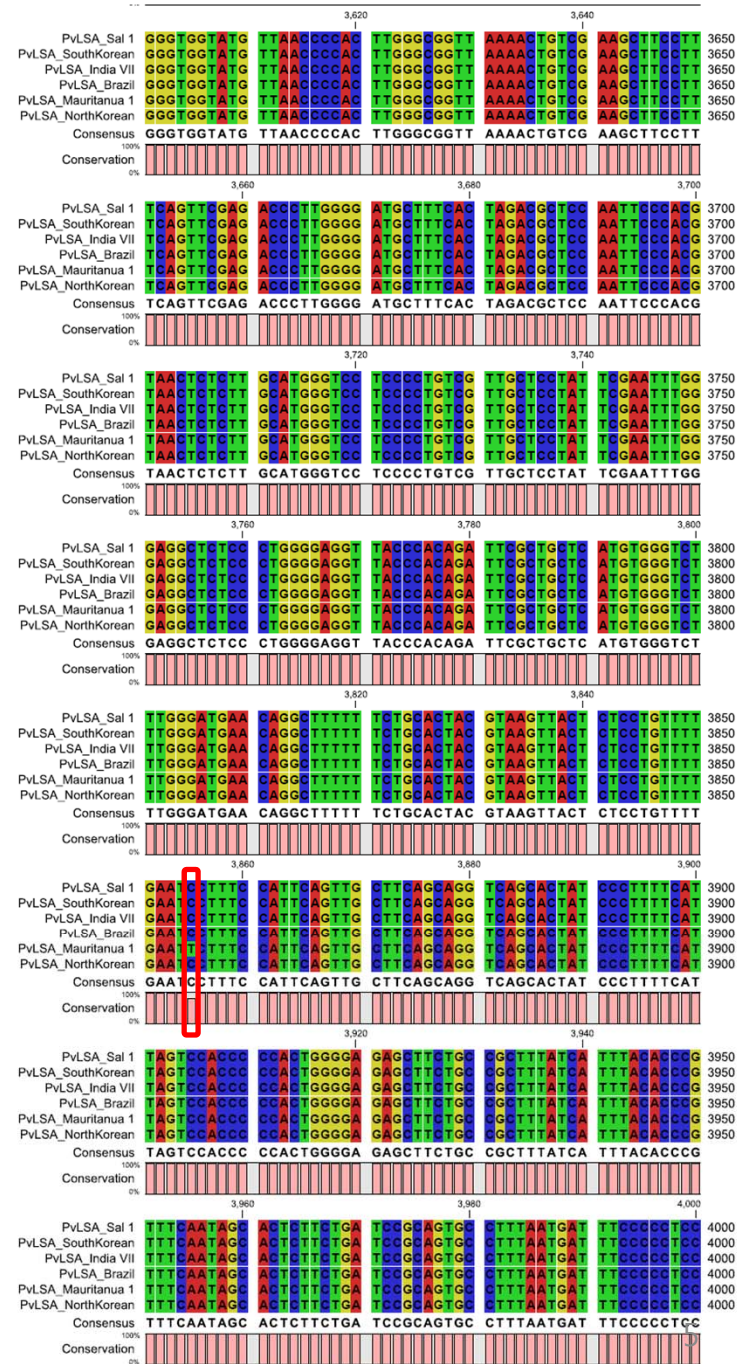



**Supplementary figure 1.**  
**Alignment of six isolates**  
**of PvLSA and their SNP**

 : SNP

 : Intron part

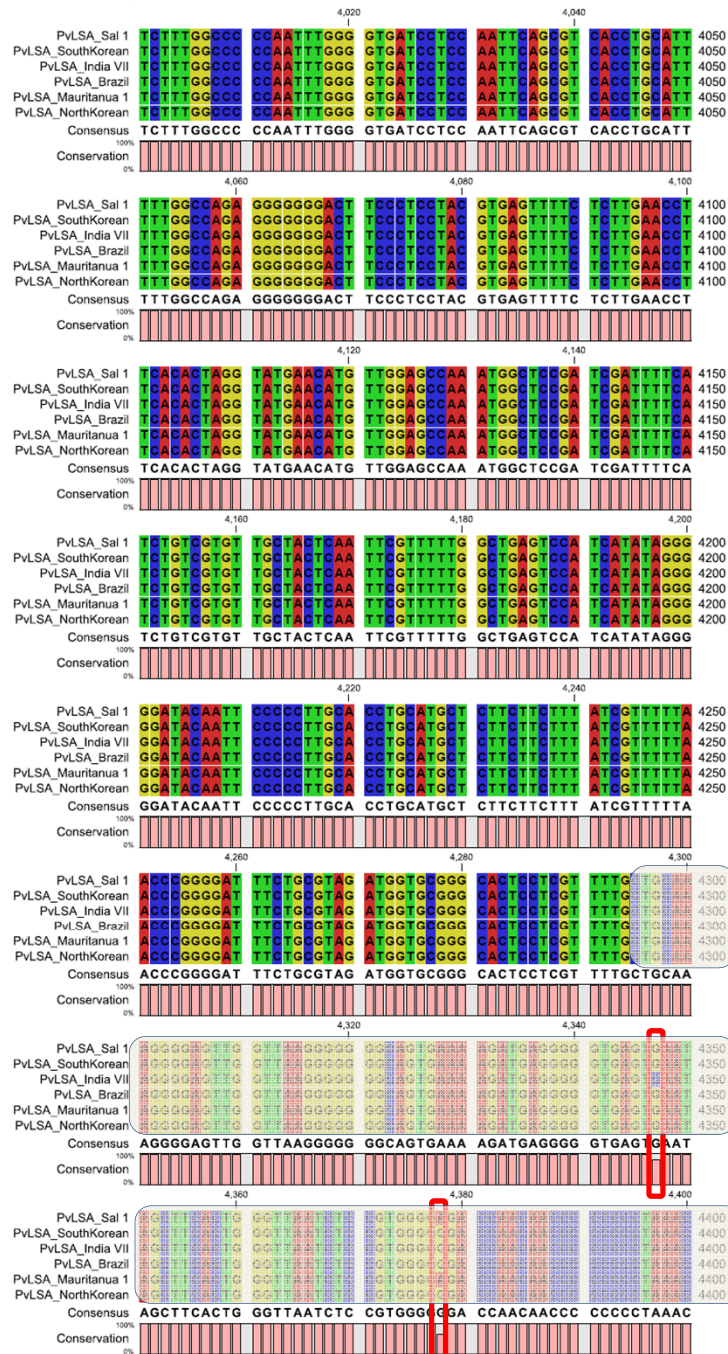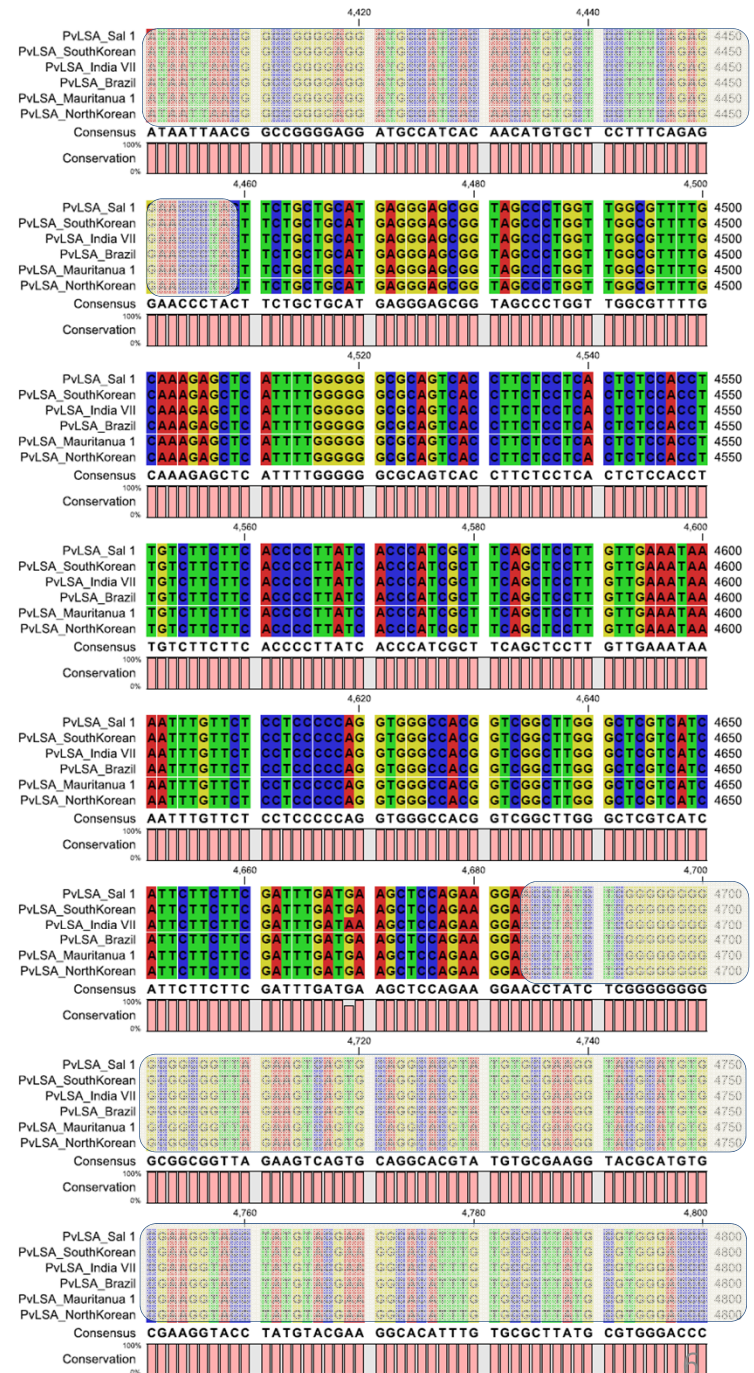



**Supplementary figure 1.**  
**Alignment of six isolates**  
**of PvLSA and their SNP**

 : SNP

 : Intron part

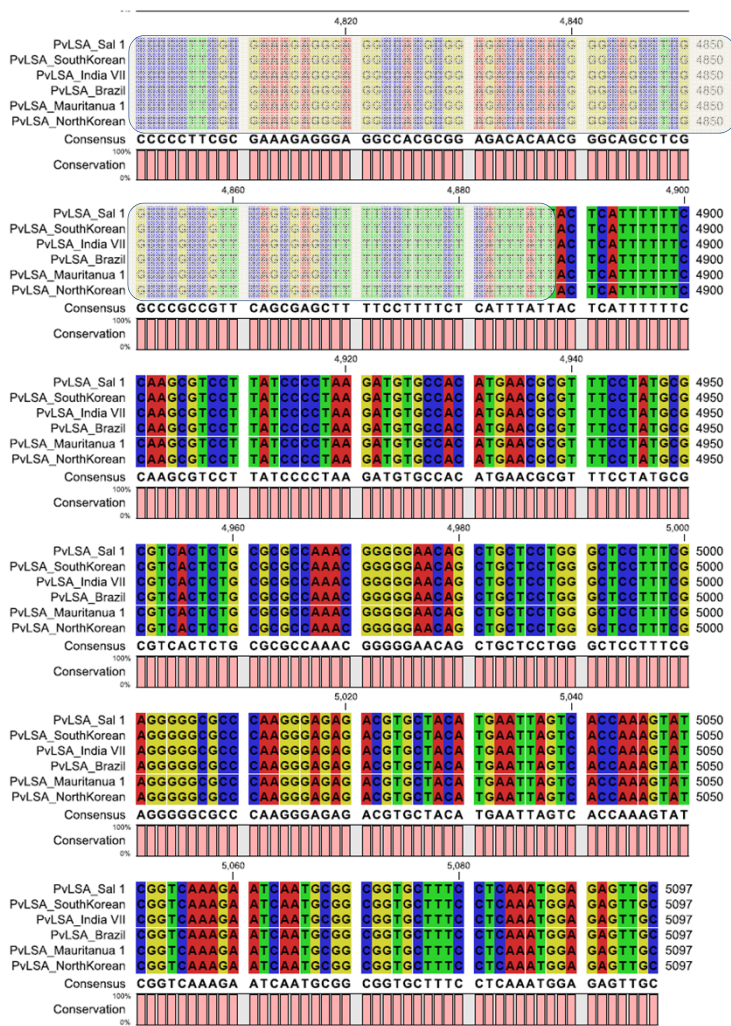

Supplement: 1756-3305-7-64-S1.pdf [file 1756-3305-7-64-S1.pdf]
